# Supplementary material for: Sarcopenia and myosteatosis are accompanied by distinct biological profiles in patients with pancreatic and periampullary adenocarcinomas
Source: PubMed Central journal article supplement (PMC5933771; doi:10.1371/journal.pone.0196235), 2018-05-03
Supplement: pone.0196235.s001.pdf [file pone.0196235.s001.pdf]

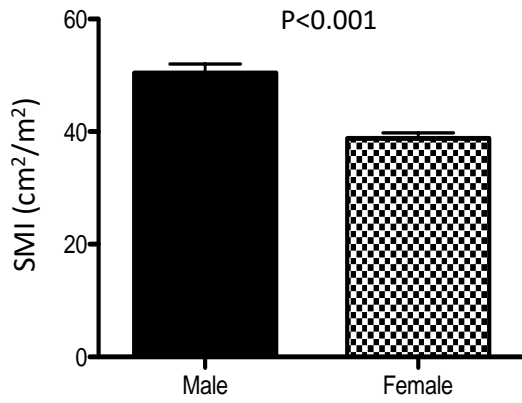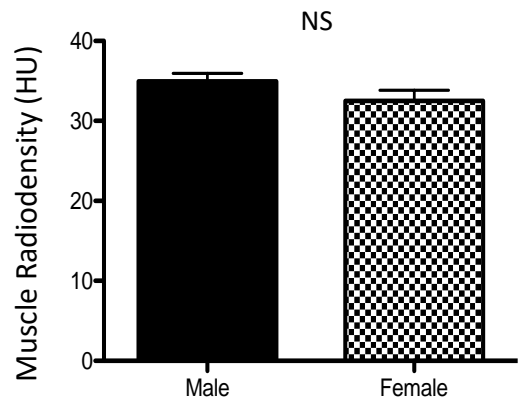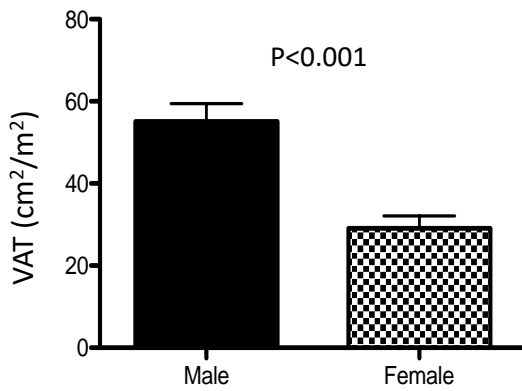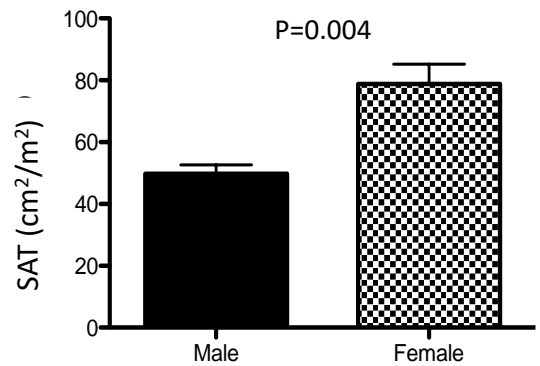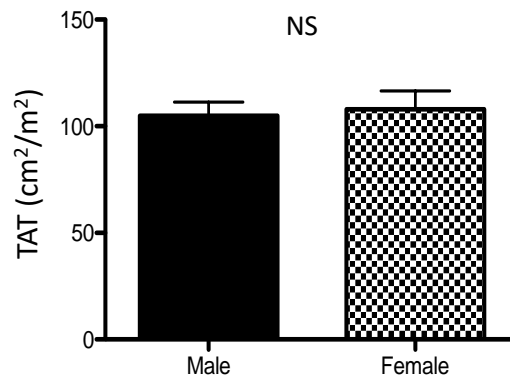

Supplementary Figure S1. Sex-related differences in muscularity, muscle attenuation, and adipose tissue distribution.
