# Supplementary material for: Sarcopenia and myosteatosis are accompanied by distinct biological profiles in patients with pancreatic and periampullary adenocarcinomas
Source: PubMed Central journal article supplement (PMC5933771; doi:10.1371/journal.pone.0196235), 2018-05-03
Supplement: pone.0196235.s003.pdf [file pone.0196235.s003.pdf]

Supplementary Table S2. Summary of factors associated with disease-free survival and overall survival on univariate and multivariate analysis.

| DFS                          | Univariate analysis |       |               | Multivariate analysis |       |               |
|------------------------------|---------------------|-------|---------------|-----------------------|-------|---------------|
|                              | P                   | HR    | CI            | P                     | HR    | CI            |
| Non-pancreatic cancer        | 0.030               | 0.570 | 0.342 – 0.951 |                       |       |               |
| CEA > 4.4                    | 0.049               | 1.709 | 0.997 – 2.929 |                       |       |               |
| CA 19-9 > 76.0               | 0.049               | 2.097 | 0.989 – 4.449 |                       |       |               |
| Anastomotic leak             | 0.058               | 0.478 | 0.220 – 1.042 |                       |       |               |
| OS                           |                     |       |               |                       |       |               |
| Non-pancreatic cancer        | 0.001               | 0.421 | 0.254 – 0.699 | 0.284                 | 0.490 | 0.133 – 1.804 |
| Muscle attenuation > 27.6 HU | 0.005               | 0.966 | 0.942 – 0.990 |                       |       |               |
| CEA > 4.4                    | 0.015               | 1.896 | 1.121 – 3.208 | <0.001                | 1.071 | 1.031 – 1.112 |
| ICU LOS > 2.0 d              | <0.001              | 1.369 | 1.116 – 1.680 |                       |       |               |
| Infectious complication      | 0.097               | 0.652 | 0.392 - 1.085 | 0.541                 | 1.448 | 0.442 – 4.737 |
| Myosteatorsis                | 0.062               | 1.559 | 0.974 – 2.494 |                       |       |               |
| Sarcopenia                   | 0.005               | 1.798 | 1.182 – 2.735 |                       |       |               |
| Sarco40 & Myo25              | 0.002               | 2.462 | 1.360 – 4.458 | 0.048                 | 3.084 | 1.009 – 9.425 |
