# Supplementary material for: Sarcopenia and myosteatosis are accompanied by distinct biological profiles in patients with pancreatic and periampullary adenocarcinomas
Source: PubMed Central journal article supplement (PMC5933771; doi:10.1371/journal.pone.0196235), 2018-05-03
Supplement: pone.0196235.s004.pdf [file pone.0196235.s004.pdf]

Supplementary Table S3. Summary of characteristics of samples from pancreatic cancer used for biological analysis. Data are expressed as mean  $\pm$ , or as N (%)

|                                                     | Serum metabolomic analysis |               |             | Skeletal muscle transcriptomic analysis |               |            |
|-----------------------------------------------------|----------------------------|---------------|-------------|-----------------------------------------|---------------|------------|
|                                                     | Sarcopenia                 | Myosteatorsis | Neither     | Sarcopenia                              | Myosteatorsis | Neither    |
| Number of Samples                                   |                            |               |             |                                         |               |            |
| <sup>1</sup> H-NMR Spectroscopy                     | 8                          | 6             | 17          |                                         |               |            |
| GC-MS                                               | 8                          | 6             | 17          |                                         |               |            |
| cDNA Microarray                                     |                            |               |             | 8                                       | 10            | 15         |
| Age, years                                          | 68 $\pm$ 10                | 74 $\pm$ 4**  | 59 $\pm$ 11 | 63 $\pm$ 11                             | 73 $\pm$ 8**  | 63 $\pm$ 9 |
| Sex, male N (%)                                     | 8 (100)                    | 1 (17)        | 8 (47)      | 4 (50)                                  | 4 (40)        | 8 (53)     |
| Diabetes, N (%)                                     | 1 (17)                     | 3 (60)        | 1 (8)       | 0 (0)                                   | 3 (30)        | 2 (13)     |
| Muscle Mass (SMI; cm <sup>2</sup> /m <sup>2</sup> ) | 42 $\pm$ 5***              | 43 $\pm$ 7    | 47 $\pm$ 7  | 38 $\pm$ 8***                           | 44 $\pm$ 8    | 49 $\pm$ 7 |
| Muscle Radiodensity (HU)                            | 38 $\pm$ 7                 | 22 $\pm$ 5*** | 41 $\pm$ 7  | 32 $\pm$ 10                             | 26 $\pm$ 3*** | 39 $\pm$ 5 |

Significance testing compared the “Sarcopenia” or “Myosteatorsis” groups with the “Neither” group. \* $P < 0.05$ ; \*\* $P < 0.01$ ; \*\*\* $P < 0.001$
